# New Viral Biogeochemical Roles Revealed Through Metagenomic Analysis of Lake Baikal

**Authors:** Coutinho, FH<sup>1</sup>, Cabello-Yeves, PJ<sup>1</sup>, Gonzalez-Serrano R<sup>1</sup>, Rosselli R<sup>2</sup>, López-Pérez M<sup>1</sup>, Zenskaya, TI<sup>3</sup>, Zakharenko, AS<sup>3</sup>, Ivanov, VG<sup>3</sup>, and Rodriguez-Valera, F<sup>1,4</sup>

**Author affiliations:**

1 – Evolutionary Genomics Group, Universidad Miguel Henández, Alicante, Spain

2 - NIOZ Royal Netherlands Institute for Sea Research, Department of Marine Microbiology and Biogeochemistry, and Utrecht University, Den Burg, The Netherlands

3 - Limnological Institute, Siberian Branch of the Russian Academy of Sciences, Irkutsk, Russia

4- Research Center for Molecular Mechanisms of Aging and Age-related Diseases, Moscow Institute of Physics and Technology, Dolgoprudny, Russia

**Corresponding author:**

Felipe Hernandez Coutinho

[fhernandes@umh.es](mailto:fhernandes@umh.es)

Universidad Miguel Hernández

Dpto. Producción Vegetal y Microbiología, Apto. 18.

Ctra. Alicante-Valencia N-332, s/n, San Juan de Alicante, Alicante, Spain

Zip Code: 03550

**Abstract**

Lake Baikal is the largest body of liquid freshwater on Earth. Previous studies have described the microbial composition of this habitat but the viral communities from this ecosystem have not been characterized in detail. Here we describe the viral diversity of this habitat across depth and seasonal gradients. We discovered 19,475 *bona fide* viral sequences, which are derived from viruses predicted to infect abundant and ecologically important taxa that reside in Lake Baikal,

30 such as Nitrospirota, Methylophilaceae and Crenarchaeota. Diversity analysis revealed significant  
31 changes in viral community composition between epipelagic and bathypelagic zones. Analysis of  
32 the gene content of individual viral populations allowed us to describe one of the first  
33 bacteriophages that infect Nitrospirota, and their extensive repertoire of auxiliary metabolic genes  
34 that might enhance carbon fixation through the reductive TCA cycle. We also described  
35 bacteriophages of methylotrophic bacteria with the potential to enhance methanol oxidation and the  
36 S-adenosyl-L-methionine cycle. These findings unraveled new ways by which viruses influence the  
37 carbon cycle in freshwater ecosystems, namely by using auxiliary metabolic genes that act upon  
38 metabolisms of dark carbon fixation and methylotrophy. Therefore, our results shed light on the  
39 processes through which viruses can impact biogeochemical cycles of major ecological relevance.

40

41 **Keywords:** Lake Baikal; Bacteriophages; Metagenomes; Auxiliary metabolic genes; Nitrospira;  
42 reductive TCA cycle; Methylotrophy; S-adenosyl-L-methionine cycle

43

#### 44 **Introduction**

45 Lake Baikal is the largest and deepest lake on Earth (1,2)□. Its uniqueness also lies in its  
46 extreme oligotrophy, ice-covered periods of up to 4-4.5 months per year, and an oxic water column  
47 throughout all depths (3)□. The lake is permanently mixed and only undergoes stratification for a  
48 brief period of time during summer in its first 100 meters (4)□. The surface of Lake Baikal freezes  
49 during winter, so that below the ice layer water temperatures approach 0°C while towards deeper  
50 waters temperature raises slightly to a maximum of 4°C. In summer, the ice layer melts and surface  
51 water temperature raises to nearly 12°C, only to decrease rapidly towards deeper waters (below  
52 50m) to the same 4°C that are kept all year around for the deep water mass. Recent metagenomic  
53 studies have analysed the microbiome of sub-ice epipelagic and bathypelagic waters, revealing the  
54 key microbes that dwell at this ecosystem as well as the ecological processes in which they are  
55 involved (5,6)□. These studies have shed light on the taxonomic composition of the Lake Baikal  
56 microbiome and the contributions of these microbes to biogeochemical cycles. Nevertheless, one  
57 important component of this ecosystem has not yet been characterized in detail: the viruses.

58 Viruses play key roles in the functioning of aquatic ecosystems (7,8)□. They mediate  
59 recycling of organic matter in these habitats by lysing host cells, which leads to the daily release of  
60 billions of tons of organic carbon (9)□. Yet the influence of viruses over aquatic microbiomes is not  
61 limited to killing. They can also modify host metabolism during infection through the expression of  
62 auxiliary metabolic genes (AMGs), which redirect host metabolism towards pathways that promote  
63 the production of viral particles, such as the nucleotide metabolism, which yields the building

64 blocks necessary to synthesize the genomes of the viral progeny. (10,11)□. There are multiple  
65 mechanisms by which viruses make use of AMGs to re-direct host metabolism. Among the  
66 noteworthy examples of AMGs are included genes of photosynthesis and carbon fixation in viruses  
67 of Cyanobacteria (12)□, genes for sulfur oxidation in viruses of Proteobacteria (13)□, and genes for  
68 carbon metabolism, phosphorus metabolism, and protein synthesis spread across multiple host taxa  
69 (14–16)□, The prevalence and diversity of AMGs varies across ecosystems (17,18)□, hence the  
70 repertoire of molecular functions encoded by AMGs is expected to change in response to the  
71 metabolic constraints faced by their hosts across different ecosystems as well.

72 Extensive research has been conducted on the biodiversity, ecology and AMGs of viruses  
73 from marine ecosystems (15,19)□. Meanwhile, viruses from freshwater ecosystems have received  
74 much less attention. Consequently, little is known about the environmental drivers of community  
75 composition, biodiversity, and auxiliary metabolic genes in these ecosystems. The use of  
76 metagenomics has made it possible to describe viruses that infect the most representative freshwater  
77 microbes, such as acI Actinobacteria (20,21)□ and SAR11 (22,23)□. Studies focused on Czech  
78 reservoirs and Lake Biwa (Japan) have reported on the extensive effects of stratification on  
79 freshwater viral communities, host prevalence and on their key roles as recyclers of organic matter  
80 (21,24)□. Specifically, these studies found that in these stratified lakes, there is constantly shifting  
81 viral community in the epilimnion and a more stable community that dwells in the hypolimnion.  
82 Meanwhile, in Lake Baikal, recent studies have described a phage putatively infecting  
83 *Polynucleobacter sp.* (5)□, the virome associated with diseased sponges (25)□, and viromes from  
84 the first epipelagic zone which suggested that the Baikal virome undergoes changes in composition  
85 across seasons (26)□

86 Here we sought to perform an in-depth characterization of the viral communities from Lake  
87 Baikal. Our sampling strategy included retrieving samples at the epipelagic (photic), mesopelagic  
88 (aphotic) and bathypelagic (aphotic) zones during winter and summer. In total, ten cellular  
89 metagenomes were obtained from which viral sequences were identified. We used computational  
90 methods to assign putative hosts to viral sequences and to classify them taxonomically. With that  
91 information we investigated shifts in community composition regarding taxonomic affiliation and  
92 target hosts that were driven by depth and season. Next we described in detail the gene content of  
93 novel viruses infecting some of the most abundant members of the Lake Baikal microbiome and  
94 their repertoire of auxiliary metabolic genes that include key metabolic processes that have not been  
95 described before in other viruses.

96

## 97 **Results and Discussion**

98 *Depth variations of Archaeal and Bacterial communities in Lake Baikal*

99 We have analysed a total of ten metagenomes sequenced from different habitats of Lake  
100 Baikal. The four datasets that represented winter microbiomes from sub-ice samples have  
101 previously been described in detail (5,6)□. We expanded this set of samples by generating a new set  
102 of six metagenomes obtained from similar geographical coordinates but collected during summer.  
103 These included two epipelagic samples (photic, 5m and 20m), two mesopelagic samples (aphotic,  
104 300m and 390m) at a site near methane seep that is notorious for high methane concentrations  
105 (27)□, and two bathypelagic (aphotic, 1250m and 1350m) samples.

106 We sought to describe the depth variations of prokaryotic community composition of Lake  
107 Baikal based on taxonomic profiles derived from metagenomes from winter and summer. Thus,  
108 read mapping was used to calculate the relative abundances of different phyla of Bacteria and  
109 Archaea across samples taken in winter (sub-ice) and summer water columns (Figure 1). As  
110 previously described, a clear distinction was observed between photic and aphotic samples (6)□. At  
111 all times, epipelagic samples tended to have higher abundances of Verrucomicrobiota,  
112 Actinobacteriota, Bacteroidota, and Cyanobacteria than their mesopelagic and bathypelagic  
113 counterparts. Acidobacteriota and Patescibacteria only displayed expressive abundances in the  
114 samples from the aphotic zone. Also, the abundances of Nitrospirota, Alphaproteobacteria, and  
115 Crenarchaeota increased towards the aphotic zone samples. Changes in energy availability brought  
116 by differences in light and temperature are major drivers of microbial community composition in  
117 aquatic habitats (28)□. The stable water temperatures in aphotic samples across seasons is likely  
118 responsible for the comparable community composition among these samples. Likewise, the more  
119 prominent change in temperature seen among photic zone samples was likely the driving factor  
120 behind the changes in prokaryotic community composition observed between seasons.

121

122 *Taxonomic classification and predicted hosts of Baikal viruses*

123 The assembled scaffolds from ten Baikal metagenomes were analysed with VirSorter (29)□,  
124 VirFinder (30)□ and queried against the pVOGs database (31)□ to identify putative viral sequences.  
125 These putative viruses were subjected to manual curation after which a total of 19,475 sequences  
126 were classified as *bona fide* viruses (Table S1). Since these viral sequences were retrieved from  
127 metagenomes of the cellular fraction (as opposed to viromes), they are likely derived from viruses  
128 that were actively replicating at the time of sampling. The *bona fide* viral sequences were clustered  
129 into 9,916 viral populations on the basis of 95% average nucleotide identity and 80% shared genes  
130 within each population (19)□. Family level taxonomic assignments were achieved for 12,689 viral  
131 sequences. Most of them were classified into the families Myoviridae (7,155), Siphoviridae (3,138),

132 Phycodnaviridae (1,195), and Podoviridae (809). The presence of viruses of eukaryotes in our  
133 dataset derives from the fact that samples were not pre-filtered to remove eukaryotic cells.  
134 Computational host prediction followed by manual curation allowed putative hosts at the taxonomic  
135 level of domain to be assigned to 2,870 viral sequences. These predictions suggested that the  
136 majority of these sequences belonged to viruses that infect Bacteria (2,135), but viruses that infect  
137 Archaea (29), Eukaryotes (621) and even virophages (85) were also identified. Among those  
138 assigned as viruses of bacteria (i.e. bacteriophages) the majority of sequences were predicted to  
139 infect Actinobacteria (640), followed by Proteobacteria (375), Bacteroidota (241) and  
140 Cyanobacteria (226). Although less frequent, some sequences were predicted to be derived from  
141 viruses that infect taxa with few or no isolated viruses such as Nitrospirota (9), Patescibacteria (14),  
142 and Crenarchaeota (23).

143

#### 144 *Environmental drivers of viral community composition at Lake Baikal*

145 We performed read recruitment from the 10 metagenomes to calculate relative abundances  
146 of viral sequences across samples. The resulting abundance matrix was used to investigate patterns  
147 of viral community composition in the Baikal ecosystem (Figure 2). These results pointed to a clear  
148 distinction between photic and aphotic samples regarding their viral community composition  
149 (Figure 2A). Among photic samples, a separation was observed between summer and winter  
150 samples which was mostly driven by viruses with high abundance among winter samples that  
151 displayed lower (sometimes below detection limit) abundances among the summer samples. No  
152 clear clustering of samples by season was observed among bathypelagic samples. All samples  
153 displayed comparable Shannon (8.0 – 9.1) and Simpson (0.9992 – 0.9996) diversity indexes,  
154 suggesting that despite the changes that take place in community composition across depth and  
155 seasons, the level of diversity within the communities remains stable.

156 Non-metric multidimensional scaling also pointed to a clear distinction between samples  
157 from the photic and aphotic zones which were separated by NMDS1 (Figure 2B). However, no clear  
158 separation of samples by season was observed by NMDS1 or NMDS2. Next we analysed each  
159 individual scaffold by comparing abundances in the photic versus aphotic samples (from the same  
160 season), and also by comparing abundances in the summer versus winter samples (from the same  
161 depth). This result revealed the specific enrichment/depletion patterns of each viral sequence across  
162 the seasonal and bathymetric gradients (Figure 2C). Specifically, we observed distinctive clouds of  
163 viral sequences separating the photic from aphotic samples in the depth comparison, and the  
164 absence of a cloud separating winter from summer samples in the season comparison. This suggests  
165 that viruses specific of a given depth zone are much more frequent than viruses of a specific season.

166           Given these observations we next investigated how community composition changed  
167 according to the source, taxonomic affiliation, and predicted hosts of the viruses. Summing up the  
168 abundances of viral sequences according to the sample from which they were assembled revealed,  
169 on the one hand, that many of the viral sequences that were assembled from photic sample  
170 metagenomes were also abundant in the aphotic samples (Figure 3A). On the other hand, some viral  
171 sequences obtained from the aphotic samples were also abundant among the photic samples, albeit  
172 at lower relative abundances. Overall, this suggests an intense mixing between communities among  
173 zones, but with a greater influence of the photic zone over the aphotic zone, as could be expected  
174 from the convection currents in the lake (4,32)□. Next we summed up the abundances of viral  
175 sequences according to their family level taxonomic affiliation, obtained by closest relative  
176 assignment. This revealed a very stable trend of community composition with only very subtle  
177 changes in the relative abundances of the dominant families (Figure 3B). Overall, all samples were  
178 dominated by viruses assigned to the family Myoviridae, followed by Siphoviridae and  
179 Phycodnaviridae, with smaller contributions of Podoviridae and Mimiviridae. Finally, we summed  
180 up abundances of viral sequences according to the phylum of their assigned hosts. This pointed to  
181 more notable variations in community composition according to depth. Overall, the dominant  
182 groups in all samples were viruses predicted to infect Actinobacteriota and Proteobacteria (Figure  
183 3C). The abundances of viruses predicted to infect Cyanobacteria decreased with depth, while the  
184 abundances of viruses predicted to infect Crenarchaeota, Chloroflexota, Planctomycetota,  
185 Nitrospirota, and Patescibacteria increased. Overall these results point to prominent changes in the  
186 composition of viral communities across the depth gradient, and subtle yet detectable differences  
187 across the seasonal changes. This is in agreement with recent findings that postulated that light and  
188 temperature are major drivers of viral community composition in marine ecosystems (19,33)□.

189           In previous studies we detected a predominance of freshwater microbes involved in the  
190 nitrification (i.e. Nitrospirota and Crenarchaeota) and oxidation of methyl compounds (i.e.  
191 Methylophilaceae) in the aphotic Lake Baikal (5,6)□. On the one hand, the ecological roles and  
192 diversity of AMGs of viruses that infect dominant groups of marine ecosystems (i.e. Cyanobacteria  
193 and Proteobacteria) has been characterized in detail (10,14,34)□. Likewise, the diversity of phages  
194 that infect Acnitobacteria (the dominant group among Baikal samples) in freshwater ecosystems has  
195 also been described in detail (20,21)□. On the other hand, the roles of viruses infecting nitrite  
196 oxidizers and methylotrophic bacteria in deep freshwater ecosystems is mostly unknown. Therefore,  
197 in this study we have focused on viruses that prey on microbes carrying out these processes,  
198 particularly viruses predicted to infect taxa for which few or no viruses have been described. In

199 what follows we describe them and their potential involvement in biogeochemical processes  
200 through AMGs.

201

202 *Nitrospirota viruses from Lake Baikal interfere with dark carbon fixation*

203 First, we manually curated the annotation of sequences of viruses predicted to infect bacteria  
204 of the phylum Nitrospirota. Members of Nitrospirota are chemolithoautotrophic bacteria that  
205 perform nitrite oxidation mediated by nitrite oxidoreductases as a mean for energy acquisition, and  
206 some species are capable of complete nitrification (commamox) from ammonia to nitrate (35,36)□.  
207 These organisms use the reductive tricarboxylic acid (rTCA) cycle for dark carbon fixation  
208 (37,38)□. The viruses assigned to Nitrospirota were clustered into four distinct viral populations:  
209 VP\_99, VP\_1723, VP\_4657 and VP\_7454. Among those, there is considerable evidence suggesting  
210 that VP\_99 (figure 4A) and VP\_1723 (Figure 4B) are actual fragments of different regions of the  
211 same (or closely related) viral genome (Table S1). First, taxonomic classification assigned viruses  
212 from both populations to the genus T4Virus within the family Myoviridae. Second, the sequence  
213 representatives of both viral populations were assembled in the summer 1350m sample. Third, the  
214 representatives of these populations have almost identical GC content of 47.48% for VP\_99 and  
215 47.23% for VP\_1723. Fourth, sequences from both populations match different regions of the  
216 Enterobacteria phage T4 genome (NC\_000866.4). Finally, members of these two populations have a  
217 somewhat complementary gene content with the hallmark viral genes missing in one being present  
218 in the other.

219 The gene content of these populations provided insights into the infection strategies taken by  
220 these viruses (Figure 4). Most notably the members of VP\_99 encoded a 4Fe-S Ferredoxin gene  
221 (Figure 4A). Ferredoxins are involved in a diverse set of redox reactions. These proteins are also  
222 involved in the energy metabolism of Nitrospirota (37)□ and on the rTCA cycle (38)□. The high  
223 degree of identity (86%) between viral and host ferredoxin suggests that this may be an AMG.  
224 Meanwhile, the members of VP\_1723 displayed a different gene content (Figure 4B). Most notably,  
225 members of this population displayed a ferredoxin oxidoreductase, an epsilon subunit of 2-  
226 oxoglutarate:ferredoxin oxidoreductase, an Iron-Sulphur cluster biosynthesis protein, and an acyl-  
227 coA desaturase. All of these proteins had best hits to *Nitrospira* genes, suggesting that those are  
228 phage AMGs acquired from the host. The ferredoxin oxidoreductase and 2-oxoglutarate:ferredoxin  
229 oxidoreductase are clustered together in the genomes of *Nitrospira defluvii*, with the same  
230 orientation and little intergenic space, suggesting that they might have been acquired by the virus  
231 together in a single event and, more importantly, that they are all involved in the same cellular  
232 process.

233 The Iron-Sulphur cluster assembly protein is likely involved in the biosynthesis of the viral  
234 encoded ferredoxin (Figure 4C). Meanwhile, the 2-oxoglutarate:ferredoxin oxidoreductase is a key  
235 enzyme of the rTCA cycle in the genus *Nitrospira* (37,39)□. The viral ferredoxin oxidoreductase  
236 displayed significant homology with several ferredoxin oxidoreductases from the phylum  
237 Nitrospirota, including the pyruvate:ferredoxin oxidoreductase beta subunit of *Nitrospira defluvii*.  
238 This enzyme also mediates a key step of the reverse TCA cycle in *Nitrospira*. The presence of such  
239 genes in a viral genome is surprising since, to our knowledge, no AMGs acting on dark carbon  
240 fixation pathways have been described so far. Collectively, the occurrence of these genes in the viral  
241 genomes suggests that viruses of Nitrospirota modulate dark carbon fixation processes during  
242 infection. This is reminiscent to the way cyanophages modulate photosynthesis and carbon fixation  
243 pathways in Cyanobacteria (12)□.

244 The acyl-coA desaturase (also known as fatty acid desaturase or Stearoyl-CoA desaturase) is  
245 an enzyme that creates double bonds in fatty acids by removing hydrogen atoms, resulting in the  
246 creation of an unsaturated fatty acid. Unsaturated fatty acids are part of cell membranes, and a  
247 higher content of unsaturated fats is associated with higher membrane fluidity. The presence of an  
248 acyl-coa desaturase indicates that these viruses modulate the lipid metabolism of their host during  
249 infection. This gene belongs to a category of AMGs that is still poorly characterized in phages  
250 (14)□. Although eukaryotic viruses are known to influence the host lipid metabolism at multiple  
251 levels (40,41)□, a comprehensive understanding of this process in viruses of bacteria has not been  
252 achieved (42)□. Some ferredoxins are also involved in lipid metabolism (43)□, thus it is possible  
253 that the viral ferredoxins and acyl-coA desaturase work together to modulate host lipid metabolism  
254 during infection.

255 Based on these findings we postulate that Nitrospirota viruses of Lake Baikal make use of a  
256 diverse array of AMGs to modulate host metabolism during infection (Figure 4C). These findings  
257 have important implications to the understanding of dark carbon fixation in freshwater ecosystems,  
258 a process of recognized importance (44,45)□ in which the role of viruses is still poorly  
259 characterized. Our data demonstrates that viral enhanced dark carbon fixation is a process of  
260 ecological relevance. Specifically, our data suggests that viral mediated alterations to host  
261 metabolism could enhance the ratio of dark carbon fixation mediated by members of the phylum  
262 Nitrospirota, which account for up to 5 % of total microbes in bathypelagic waters of Lake Baikal.  
263 Thus, these viruses might play important roles in production of organic carbon by Nitrospirota that  
264 is eventually made available to the whole community following viral lysis. A previous publication  
265 reported the discovery of a Nistropirota virus from Lake Biwa, Japan (24)□. Nevertheless this  
266 sequence displayed no detectable homology to our viruses at the nucleotide level.



267

268 *Baikal viruses infecting methylotrophs interfere with methylotrophic metabolism and other major*  
269 *pathways*

270 We identified viral populations predicted to infect methylotrophic bacteria. Among these,  
271 were included populations VP\_139 (Figure 5A) and VP\_266 (Figure 5B). These populations  
272 displayed ambiguous host predictions, with homology matches to multiple bacterial phyla  
273 (Bacteroidota and Proteobacteria). Hence, our original pipeline only assigned hosts to most  
274 members of these populations to the level of domain. Manual inspection of their computational host  
275 predictions revealed that homology matches to members of the family Methylophilaceae had higher  
276 bit-scores and identities and lower number of mismatches, indicating that members of VP\_139 and  
277 VP\_266 infect methylotrophic bacteria of the family Methylophilaceae, possibly from the closely  
278 related genera *Methylopumilus*, *Methylophilus* or *Methylotenera*. As before, we found evidence that  
279 these sequences are derived from the same genome (Table S1), as suggested by their  
280 complementary gene content, taxonomic affiliation (T4Virus), assembly source (winter surface  
281 samples), and GC content (35%).

282 Representative members of both VP\_139 and VP\_266 populations encoded methanol  
283 dehydrogenase (Figures 5A and 5B), a hallmark gene of methylotrophic metabolism in bacteria  
284 (46,47)□. This gene is responsible for the conversion of methanol into formaldehyde, the first and  
285 fundamental step of methylotrophic metabolism. To our knowledge, this is the first time this gene is  
286 being reported in viruses. We propose that viral methanol dehydrogenase is a novel AMG used by  
287 phages upon infection to boost up energy production of their methylotrophic hosts.

288 The representative sequence of VP\_266 also encoded the pyrroloquinoline quinone  
289 precursor peptide PqqA. Pyrroloquinoline quinone (PQQ) is a redox cofactor which is necessary for  
290 the activity of the methanol dehydrogenase (48)□. The biosynthesis of PQQ is mediated by radical  
291 SAM proteins (49,50)□, which were detected in the genomes of VP\_139. The representative  
292 sequence of VP\_139 encoded also a methionine adenosyltransferase, which performs biosynthesis  
293 of S-adenosylmethionine (SAM) from L-methionine in the S-adenosyl-L-methionine cycle. In  
294 addition, it encoded an S-adenosyl-L-homocysteine hydrolase (5'-methylthioadenosine/S-  
295 adenosylhomocysteine nucleosidase) which performs the conversion of S-adenosyl-L-homocysteine  
296 into S-ribosyl-L-homocysteine also within this cycle. Methyltransferases, three of which were  
297 found in the representative genome of VP\_139, also play a fundamental role on the S-adenosyl-L-  
298 methionine cycle, mediating the demethylation of S-adenosyl-L-methionine to convert it into S-  
299 adenosyl-L-homocysteine (51)□. The presence of so many auxiliary metabolic genes of the S-

300 adenosyl-L-methionine cycle suggests that modulating this pathway is of fundamental relevance for  
301 the replication process of these viruses.

302 Members of VP\_139 also encoded a phosphoribosylaminoimidazole synthetase  
303 (phosphoribosylformylglycinamide cyclo-ligase, *purM* gene), a widespread viral gene which is  
304 involved in nucleotide metabolism, and alpha and beta subunits for ribonucleotide-diphosphate  
305 reductase, which is also involved in this pathway. Together these observations suggest that members  
306 of VP\_139 and VP\_266 have a diverse array of proteins to modulate the metabolism of their  
307 methylotrophic hosts during infection (Figure 5C). This is achieved by expressing genes for  
308 methanol dehydrogenase and the cofactor PQQ to enhance the ratios of methanol oxidation to  
309 formaldehyde. It also expresses genes to boost up the biosynthesis of PQQ and the S-adenosyl-L-  
310 methionine cycle. Together these changes to host metabolism are likely to enhance the production  
311 of formaldehyde from methanol oxidation. The generated formaldehyde is then converted into  
312 formate through the tetrahydrofolate pathway or directed to the ribulose monophosphate cycle. The  
313 representative sequence of VP\_266 encoded a peptide deformylase. This represents yet another  
314 candidate AMG, which would act to enhance the formate pool by removing formyl groups from  
315 host peptides. Interestingly, formate is used by phosphoribosylglycinamide formyltransferase 2 in  
316 the 5-aminoimidazole ribonucleotide biosynthesis pathway. Downstream of this step of the 5-  
317 aminoimidazole ribonucleotide biosynthesis pathway, phosphoribosylaminoimidazole synthetase  
318 and ribonucleotide-diphosphate reductase, that also participate in the biosynthesis of purines, were  
319 also found in the viral genomes. Thus, we conclude that these viruses enhance the methylotrophic  
320 metabolism of their hosts for the purpose of redirecting it towards the synthesis of nucleotides to be  
321 used in the replication of the viral genome (Figure 5C).

322 The discovery of these AMGs represents yet another novel way by which Baikal viruses  
323 modulate host metabolism. In this case it is of special relevance that these viruses affect three  
324 different host pathways: methanol oxidation, nucleotide metabolism, and the S-adenosyl-L-  
325 methionine cycle. In addition to this extensive gene repertoire we also identified other genes among  
326 these viral populations with the potential to be AMGs, albeit not directly linked to methanol  
327 oxidation or nucleotide metabolism. They included: glycerol-3-phosphate cytidyltransferase  
328 which is involved in cell wall teichoic acid biosynthesis (52)□, and a class II aldolase/adducin  
329 family protein. Although our data does not allow us to determine the roles of these two proteins  
330 during infection, their presence among viral genomes is a novelty and it points to the diversity of  
331 strategies of these viruses to modulate host metabolism. A previous study has reported the isolation  
332 of a siphovirus (Phage P19250A) infecting *Methylopusillus planktonicus* (LD28) from Lake Soyang

333 in South Korea. Nevertheless, this virus did not encode any of the putative AMGs reported here  
334 (53)□.

335 Another relevant microbe in the bathypelagic water column of Lake Baikal is  
336 *Methyloglobulus*, a genus of small (ca. 2.2 Mb of estimated genome size), yet abundant  
337 methanotrophs. These organisms were estimated to be among the most abundant microbes in  
338 bathypelagic waters of Lake Baikal (accounting up to 1 % of total mapped reads) and a MAG  
339 derived from this genus was described (6)□. We identified a viral population predicted to infect  
340 *Methyloglobulus*. In particular VP\_1254 was composed of scaffolds of ca. 17 Kb that were  
341 assembled from bathypelagic metagenomes from both summer and winter (Figure 6A). These  
342 scaffolds displayed multiple homology matches to various taxa of Gammaproteobacteria. Among  
343 these, they consistently had high identity hits to a DnaK chaperone gene from the Baikal  
344 *Methyloglobulus* MAG. Finally, read recruitment confirmed the prevalence of these viruses among  
345 bathypelagic samples and absence from epipelagic and mesopelagic zones, following a pattern  
346 similar to that observed for *Methyloglobulus* (Figure. 6B). To our knowledge, no genomes of  
347 viruses infecting freshwater *Methyloglobulus* have been described. The gene content of these  
348 viruses included proteins involved in production of curly polymers and the ribosomal protein S21,  
349 which were previously detected in SAR11 phages (23)□ and a putative *Polynucleobacter* phage  
350 (5)□. Interestingly, these viruses did not encode the diverse array of AMGs described for the  
351 methylotroph viruses from VP\_139 and VP\_266, possibly because these sequences do not represent  
352 the complete viral genome. Another possible explanation is the fact that viruses from VP\_139 and  
353 VP\_266 are typical of the epipelagic zone, while those from VP\_1254 are typical of the  
354 bathypelagic zone. Therefore, the metabolic constraints faced by these two groups of viruses during  
355 infection might be drastically different. These differences could explain the distinct array of AMGs  
356 between these two groups despite the fact that they infect closely related hosts with similar one-  
357 carbon metabolisms.

358

### 359 *Novel freshwater viruses of Crenarcheota*

360 One of the singularities of the bathypelagic and mesopelagic Lake Baikal waters was the  
361 high abundances of Crenarchaeota (formerly Thaumarchaeota, e.g. *Nitrosopumilus* and  
362 *Nitrosoarchaeum*). We identified viral scaffolds predicted to infect Crenarchaeota in both summer  
363 and winter from bathypelagic and mesopelagic samples. Specifically, we retrieved scaffolds from  
364 multiple populations that presented a remarkable synteny to previously described marine  
365 Crenarchaeota viruses (Marthavirus) (54)□. The gene content of these scaffolds was conserved  
366 regardless of their sample of origin, as well as their gene order (Figure 7A). In addition, the typical

367 Marthavirus genes radA, ATPases and CobS were conserved in their Lake Baikal counterparts. Thus,  
368 these viruses from Lake Baikal are the first representatives of freshwater viruses of Crenarchaeota,  
369 which are closely related to marine Marthavirus. However, a notorious difference between the  
370 marine and freshwater viruses of Crenarchaeota was the distribution of isoelectric points among  
371 their protein encoding genes (Figure 7B). Specifically, the isoelectric points of the Mediterranean  
372 Marthavirus representative was displaced towards more acidic values. This same tendency has been  
373 previously observed when comparing proteomes of Nitrosopumilaceae from marine and freshwater  
374 environments (55)□. This finding demonstrates that the shift in the distribution of isoelectric points  
375 among proteins that is observed during marine-freshwater transitions also extends to viruses, which  
376 sheds light on the processes by which these biological entities expand their ecological niches over  
377 time.

378

### 379 *Concluding remarks*

380 We have taken advantage from the availability of metagenomes of Lake Baikal to shed light  
381 into the diversity of viruses within this unique habitat. Because we used metagenomes collected  
382 using a 0.2 µm filter we expected to obtain only the viral genomes that were being replicated within  
383 the retained cells. This method has been widely used and provides information about the viruses  
384 that are active in the community (20,56)□. Nevertheless, there might be other viruses that were  
385 missed by our approach but that might be recovered by sequencing the viral particles (virome).  
386 Even so we have obtained a large number of novel genomes of the most active viruses present in  
387 these samples. Interestingly, among them we have identified viruses predicted to prey on microbes  
388 that are major components of the community and which provide critical ecological functions.  
389 Specifically, in the large aphotic water mass of this deep lake.

390 We have found in Baikal another example of close relatives between marine and freshwater  
391 environments, the Crenarchaeota viruses. The degree of synteny observed between Marthaviruses  
392 and the Baikal scaffolds was remarkable. The occurrence of a large aerobic and deep water mass (a  
393 common feature between the ocean and Lake Baikal) is likely what facilitated the transition of these  
394 viruses between the two environments. Such parallelisms allow detection of specific adaptations  
395 required to live in low salt environments (the concentration of sodium for example is barely  
396 detectable in Baikal). One difference that has been detected in all cases of marine-freshwater  
397 transitions is the decrease in the isoelectric point of the proteome (55)□. The fact that this could  
398 also be detected in viruses indicates how critical this adaptation results for a proper functioning of  
399 basic molecular machinery such as that of DNA replication, transduction and translation.

400 In conclusion, our analysis of the viral communities from Lake Baikal has demonstrated  
401 how their composition and functioning changes across seasons and depths. These findings shed new  
402 light on the influence of environmental parameters over viruses in freshwater ecosystems. In  
403 addition, we described novel viruses with unique gene repertoires, thus expanding the  
404 understanding of viral genetic diversity. These novel viruses also displayed new strategies for  
405 modulating host metabolism through auxiliary metabolic genes, by which they influence processes  
406 of ecological relevance, namely the methylotrophic metabolism and dark carbon fixation. Together  
407 these findings expand the understanding of viruses, the most abundant yet elusive biological entities  
408 on Earth and reveal novel roles played by them in processes of major biogeochemical relevance that  
409 take place in freshwater ecosystems.

410

411

## 412 **Methods**

### 413 *Sampling and environmental parameters*

414 The sampling strategy and sample post-processing for winter samples have been previously  
415 described (5,6)□. Summer samples were collected with the SBE 32 Carousel Water Sampler from  
416 aboard the RV ‘Vereshchagin’ in July 2018. Between 20 and 100 liters of water samples were  
417 retrieved from four horizons on each station. Water temperature and salinity were simultaneously  
418 measured with sensors SBE 19 Plus and SBE 25 Sealogger CTD (Sea-Bird Electronics) accurate  
419 within 0.002°C and with a resolution of 0.0003°C. pH values were measured using a pH 3310 meter  
420 (WTW, Germany). Overall, the hydrological conditions and the mineralization in the water column  
421 of the studied area corresponded to the data that were previously recorded during the same period in  
422 Lake Baikal (57,58)□. At Station 2, samples obtained on two runs were used to isolate DNA. The  
423 total volume of filtered water from the 300m sample was 70 L, and from the 390m sample the  
424 volume was 60 L.

425 For metagenomes, each sample was filtered through a net (size 27 µm) and then filtered  
426 through nitrocellulose filter with a pore size of 0.22 µm (Millipore, France), and the material from  
427 the filter was transferred to sterile flasks with 20 mL of lysis buffer (40 mmol L<sup>-1</sup> EDTA, 50 mmol  
428 L<sup>-1</sup> Tris/HCl, 0.75 mol L<sup>-1</sup> sucrose) and stored at -20°C. DNA was extracted according to the  
429 modified method of phenol-chloroformisoamyl alcohol method and stored at -70°C until further  
430 use. Metagenome sequencing, read-cleaning and assembly steps were performed as previously  
431 described (5,6)□.

432

### 433 *Sequence processing and analysis*

434 Coding DNA sequences were identified in assembled scaffolds using Prodigal (59)□.  
435 Isoelectric points were calculated for each protein as previously described (55)□. Proteins  
436 sequences were queried against the NCBI-nr database using DIAMOND v0.8.22 (60)□ and Pfam  
437 using HMMER v3.1b2 (61)□ for taxonomic and functional annotation. Identification of putative  
438 viral sequences was performed in three steps: Sequences were analysed through VirSorter v1.0.6  
439 (29)□ and those assigned to categories 1 and 2 and were considered as putative viruses. Also,  
440 sequences were analysed with VirFinder v1.1 (30)□ and those with a score  $\geq 0.7$  and p-value  $\leq 0.05$   
441 were also considered putative viruses. Finally, protein sequences extracted from the scaffolds were  
442 queried against the pVOGs database (31)□ using HMMER set to a maximum e-value of 0.00001  
443 (61)□. For each scaffold, we calculated the added viral quotient (AVQ) as the sum of the viral  
444 quotients of each pVOG that hits with the proteins of each scaffold (62)□. Scaffolds for which at  
445 least 20% of proteins mapped to pVOGs resulting in an AVQ  $\geq 2$  were considered putative viruses.  
446 Finally all of the putative viral sequences were subjected to manual inspection of their gene content  
447 and sequences that did not display a clearly viral signature (i.e. presence of hallmark viral genes and  
448 enrichment of hypothetical proteins) were excluded from further analysis resulting in a dataset of  
449 *bona fide* viral sequences. In addition, the *bona fide* viral sequences were clustered into viral  
450 populations based on 80% of shared genes at 95% average nucleotide identify as previously  
451 described (19)□.

452

#### 453 *Taxonomic classification of viral sequences*

454 Taxonomic affiliation of viral sequences was performed by closest relative affiliation. First,  
455 protein sequences derived from the *bona fide* viral sequences were queried against the viral  
456 sequences from the NCBI-nr database. DIAMOND was used with the following parameters:  
457 identity  $\geq 30\%$ , bit-score  $\geq 50$ , alignment length  $\geq 30$  amino acids and e-value  $\leq 0.00001$  and the  
458 BLOSUM45 matrix. Next, the closest relative of each sequence was defined as the taxon that  
459 matched the highest number of protein sequences. Potential ties between taxa were resolved by  
460 selecting the one with the highest value of average identity among hits as the closest relative.

461

#### 462 *Computational host prediction of viral sequences*

463 Host predictions were performed based on previously reported benchmarking of methods to  
464 assign putative hosts to viruses based on shared genetic content between virus and host (63)□. For  
465 these searches, two reference databases were used: the NCBI RefSeq genomes of Bacteria and  
466 Archaea and a dataset of 266 prokaryote metagenome assembled genomes (MAGs) previously  
467 obtained from Lake Baikal (5,6)□. The taxonomic affiliation of RefSeq genomes was obtained from

468 the Genomic Taxonomy Database (GTDB) (64)□. Baikal MAGs were also classified according to  
469 the GTDB system using GTDB-tk v0.3.2 (65)□. Three signals of virus-host association were  
470 analysed: homology matches, shared tRNAs, and CRISPR spacers. Homology matches were  
471 performed by querying viral sequences against the databases of prokaryote genomes using BLASTn  
472 v2.6.0+ (66)□. The cut-offs defined for these searches were: minimum alignment length of 300 bp,  
473 minimum identity of 50% and maximum e-value 0.001. tRNAs were identified in viral scaffolds  
474 using tRNAScan-SE v1.23 (67)□ using the bacterial models. The obtained viral tRNAs were  
475 queried against the database of prokaryote genomes using BLASTn. The cut-offs defined for these  
476 searches were: minimum alignment length of 60 bp, minimum identity of 90%, minimum query  
477 coverage of 95%, maximum of 10 mismatches and maximum e-value of 0.001. CRISPR spacers  
478 were identified in the databases of prokaryote genomes using CRISPRDetect v2.2 for the MAGs  
479 (68)□ and a custom script for the RefSeq genomes (69)□. The obtained spacers were queried  
480 against the sequences of *bona fide* viral sequences also using BLASTn. The cut-offs defined for  
481 these searches were: minimum identity of 95%, minimum query coverage of 95%, maximum of 1  
482 mismatch and maximum e-value of 1. Ambiguous host predictions that assigned viruses to different  
483 microbial taxa were removed at each taxonomic level. Finally, putative hosts were also assigned to  
484 the *bona fide* viral sequences by manually inspecting their gene content.

485

#### 486 *Prokaryote and viral abundance analysis*

487 A database was compiled with one genome from each species representative of Bacteria and  
488 Archaea from the Genome Taxonomy Database (GTDB, release 89) (64)□. Protein sequences were  
489 predicted from these genomes using Prodigal v2.6.3 (59)□ with default parameters. Finally reads  
490 from the 10 metagenomes were queried against the GTDB database of protein encoding genes using  
491 DIAMOND (60)□ setting e-value to 0.00001 and minimum Bitscore to 50. For viruses, reads from  
492 the 10 metagenomes were queried against the assembled Baikal scaffolds using the sensitive-local  
493 mode of Bowtie2 v2.3.5.1 (70)□. The resulting abundance matrix was analysed using the Vegan  
494 Package (71)□ in R v3.6.1. Non-metric multidimensional scaling (NMDS) was performed based on  
495 the relative abundances of viral sequences using the Bray-Curtis dissimilarity measure.

496

#### 497 **Data availability**

498 Raw reads of winter (sub-ice) Lake Baikal metagenomes were previously published and are  
499 publicly available under the Bioproject numbers PRJNA396997 (SRR5896115 and SRR5896114  
500 for 5 and 20 m samples, respectively) and PRJNA521725 (SRR8561390 and SRR8561391 for 1250  
501 and 1350 m samples, respectively). Summer metagenomes have been deposited on NCBI SRA

502 under bioproject number PRJNA615165. All assembled scaffolds were deposited at ENA under  
503 project number PRJEB37526.

504

#### 505 **Code availability**

506 All the relevant code used in data analysis is publicly available.

507

#### 508 **Acknowledgments**

509 This work was supported by grants “VIREVO” CGL2016-76273-P [MCI/AEI/FEDER, EU]  
510 (cofounded with FEDER funds) from the Spanish Ministerio de Ciencia e Innovación and  
511 “HIDRAS3” PROMETEU/2019/009 from Generalitat Valenciana. FRV was also a beneficiary of  
512 the 5top100-program of the Ministry for Science and Education of Russia. FHC and PJCY were  
513 respectively supported by APOSTD/2018/186 and APOSTD/2019/009 post-doctoral fellowships  
514 from Generalitat Valenciana. RGS was supported by a predoctoral fellowship from the Valencian  
515 Consellería de Educació, Investigació, Cultura i Esport (ACIF/2016/050). The State Assignment  
516 0345-2019-0007 supported the work (no. AAAA-A16-116122110064-7) of the Limnological  
517 Institute and grant OFIM no. 17-29-05040.

518

#### 519 **Author contributions**

520 FHC, PJCY, TIZ, ASZ, VGI and FRV conceived and designed experiments. PJCY, TIZ, ASZ, VGI  
521 and FRV collected samples and associated metadata. FHC, PJCY, RGS, RR and MLP analysed the  
522 data. All authors contributed to writing the manuscript.

523

#### 524 **Competing interests:**

525 The authors declare that they have no competing interests.

526

527 **Ethics Approval and Consent to Participate:** Not Applicable.

528

529 **Consent for publication:** Not Applicable.

530

#### 531 **Figure legends:**

532 Figure 1: Lake Baikal prokaryotic community composition. Barplots depict the relative abundances  
533 of taxa of Archaea and Bacteria at the level of phylum (or class in the case of Proteobacteria) across  
534 the ten metagenomes from Lake Baikal. Only taxa that displayed relative abundances equal or  
535 above 1% are shown.



536

537 Figure 2: Lake Baikal viral community composition. A) Heatmap depicting the Z-score transformed  
538 abundances of 19,475 *bona fide* viral sequences across ten metagenomes from Lake Baikal. Both  
539 samples (columns) and viral sequences (rows) were subjected to hierarchical clustering based on  
540 Bray-Curtis dissimilarity distances. Side row colors indicate the sample from which each viral  
541 sequence was assembled. B) Non-metric multidimensional scaling comparison of the abundance of  
542 viral sequences across 10 baikal metagenomes based on Bray-Curtis dissimilarity distances. C)  
543 Scatterplots depicting the abundances of each viral scaffold paired by depth and season. In the left  
544 panel the relative abundances of sequences in the photic samples is displayed in the X axis while  
545 the abundance in the aphotic samples is displayed in the Y axis. Samples were paired as follows: 5m  
546 Winter x 1250m Winter; 5m Summer x 1250m Summer;  
547 20m Winter x 1350m Winter; 20m Summer x 1350m Summer. In the right panel the relative  
548 abundances of sequences in the winter samples is displayed in the X axis while the abundance in the  
549 summer samples is displayed in the Y axis. Samples were paired as follows: 5m Winter x 5m  
550 Summer; 20m Winter x 20m Summer; 1250m Winter x 1250m Summer, 1350m Winter x 1350m  
551 Summer.

552

553 Figure 3: Barplots depicting the abundance of Baikal viruses summed up according to scaffold  
554 groups. A) Abundances summed up according to sample source of scaffolds B) Abundances  
555 summed up according to family level taxonomic classification of scaffolds. C) Abundances summed  
556 up according to predicted host phylum of scaffolds. Only families and host phyla that displayed  
557 abundances equal or above 0.5% are shown.

558

559 Figure 4: Novel viruses of Nitrospirota from Lake Baikal. A) Genomic map of Nitrospirota virus  
560 representative of VP\_99. B) Genomic map of Nitrospirota virus representative of VP\_1723. C)  
561 Reductive TCA cycle in Nitrospirota and potential influence of viruses over it. Enzymes are  
562 depicted in blue. Putative AMGs present in the genomes of either VP\_99 or VP\_1723 are  
563 highlighted by red rectangles.

564

565 Figure 5: Novel viruses of Methylophs from Lake Baikal. A) Genomic map of virus  
566 representative of VP\_139. B) Genomic map of virus representative of VP\_266. C) Metabolic  
567 pathways of Methylophs and potential influence of viruses over it. Enzymes are depicted in blue.  
568 Putative AMGs present in the genomes of either VP\_139 or VP\_266 are highlighted by red

569 rectangles. Colored rectangles separate different pathways/cycles. For simplicity, some reactions  
570 were omitted (represented by dashed arrows).

571

572 Figure 6: Novel *Methyloglobulus* virus from Lake Baikal. A) Genomic map of virus representative  
573 of VP\_1254. B) Barplots depicting the abundances of the representative sequence of VP\_1254 and  
574 its putative host MAG *Methyloglobulus* sp. Baikal-deep-G142 expressed as RPKG.

575

576 Figure 7: Novel Crenarchaeota viruses from Lake Baikal. A) Synteny maps depicting the  
577 similarities between a representative sequence of VP\_2384 and a marine Marthavirus sequence. B)  
578 Distribution of isoelectric points among proteins from marine Marthaviruses and a close relative  
579 from Lake Baikal.

580

581 Table S1: Detailed description of all the analysed Baikal scaffolds. Fields include Completeness  
582 inferred by VirSorter. For each taxonomic level from domain to species: taxon name, number of  
583 CRISPR hits, number of homology matches hits, number of shared tRNA hits. Scaffold length. For  
584 each taxonomic level from domain to species: closest relative (CR) average amino acid identity  
585 (AAI), number of matched protein encoding genes (PEGs), percentage of matched PEGs relative to  
586 the total number of PEGs identified in the scaffold, and CR taxon name. MD5: MD5 checksum of  
587 scaffold sequence. Number of identified protein encoding genes. True\_Virus: indicating if the  
588 scaffold was classified as a *bona fide* virus sequence. VP: Viral population to which scaffold was  
589 assigned. VirFinder score and p-value, VirSorter category, percentage of scaffold PEGs matched to  
590 pVOGs database, total number of hits to pVOGs database and added viral quotient (AVQ) of these  
591 hits.

## 592 **References**

- 593 1. Kozhov MM. Biology of lake Baikal. Publ house Acad Sci USSR, Moscow. 1962;
- 594 2. Weiss RF, Carmack EC, Koropalov VM. Deep-water renewal and biological  
595 production in Lake Baikal. *Nature* [Internet]. 1991 Feb;349(6311):665–9. Available from:  
596 <http://www.nature.com/articles/349665a0>
- 597 3. Galazy GI. Atlas of Lake Baikal. GUGK, Moscow. 1993;489.
- 598 4. Shimaraev MN, Granin NG. On stratification and convection mechanism in Baikal. In: Dokl  
599 Akad Nauk SSSR. 1991. p. 381–5.
- 600 5. Cabello-Yeves PJ, Zemskaya TI, Rosselli R, Coutinho FH, Zakharenko AS, Blinov VV, et al.  
601 Genomes of novel microbial lineages assembled from the sub-ice waters of Lake Baikal.  
602 *Appl Environ Microbiol*. 2018;84(1).
- 603 6. Cabello-Yeves PJ, Zemskaya TI, Zakharenko AS, Sakirko M V, Ivanov VG, Ghai R, et al.  
604 Microbiome of the deep Lake Baikal, a unique oxic bathypelagic habitat. *Limnol Oceanogr*  
605 [Internet]. 2019 Dec 30;Ino.11401. Available from:  
606 <https://onlinelibrary.wiley.com/doi/abs/10.1002/lno.11401>
- 607 7. Suttle CA. Viruses in the sea. *Nature* [Internet]. 2005;437(7057):356–61. Available from:  
608 <http://www.ncbi.nlm.nih.gov/pubmed/16163346>
- 609 8. Danovaro R, Dell'Anno A, Corinaldesi C, Magagnini M, Noble R, Tamburini C, et al. Major  
610 viral impact on the functioning of benthic deep-sea ecosystems. *Nature* [Internet]. 2008  
611 Aug;454(7208):1084–7. Available from: <http://www.nature.com/articles/nature07268>
- 612 9. Breitbart M. Marine Viruses: Truth or Dare. *Ann Rev Mar Sci* [Internet]. 2012 Jan  
613 15;4(1):425–48. Available from: <http://www.annualreviews.org/doi/10.1146/annurev-marine-120709-142805>
- 615 10. Rosenwasser S, Ziv C, Creveld SG van, Vardi A. Virocell Metabolism: Metabolic  
616 Innovations During Host–Virus Interactions in the Ocean. *Trends Microbiol* [Internet]. 2016  
617 Oct;24(10):821–32. Available from:  
618 <http://linkinghub.elsevier.com/retrieve/pii/S0966842X16300695>
- 619 11. Howard-Varona C, Lindback MM, Bastien GE, Solonenko N, Zayed AA, Jang H, et al.  
620 Phage-specific metabolic reprogramming of virocells. *ISME J* [Internet]. 2020 Jan 2;  
621 Available from: <http://www.nature.com/articles/s41396-019-0580-z>
- 622 12. Thompson LR, Zeng Q, Kelly L, Huang KH, Singer AU, Stubbe J, et al. Phage auxiliary  
623 metabolic genes and the redirection of cyanobacterial host carbon metabolism. *Proc Natl*  
624 *Acad Sci* [Internet]. 2011;108(39):E757–64. Available from:  
625 <http://www.pnas.org/cgi/doi/10.1073/pnas.1102164108>
- 626 13. Roux S, Hawley AK, Beltran MT, Scofield M, Schwientek P, Stepanauskas R, et al. Ecology  
627 and evolution of viruses infecting uncultivated SUP05 bacteria as revealed by single-cell-  
628 and meta-genomics. *Elife*. 2014;2014(3):1–20.

- 629 14. Breitbart M, Bonnain C, Malki K, Sawaya NA. Phage puppet masters of the marine  
630 microbial realm. *Nat Microbiol* [Internet]. 2018 Jul 4;3(7):754–66. Available from:  
631 <http://www.nature.com/articles/s41564-018-0166-y>
- 632 15. Roux S, Brum JR, Dutilh BE, Sunagawa S, Duhaime MB, Loy A, et al. Ecogenomics and  
633 biogeochemical impacts of uncultivated globally abundant ocean viruses. *Nature* [Internet].  
634 2016;537(7622):589–693. Available from:  
635 <http://biorxiv.org/content/early/2016/05/12/053090.abstract>
- 636 16. Trubl G, Jang H Bin, Roux S, Emerson JB, Solonenko N, Vik DR, et al. Soil Viruses Are  
637 Underexplored Players in Ecosystem Carbon Processing. *mSystems*. 2018;3(5):1–21.
- 638 17. Coutinho FH, Silveira CB, Gregoracci GB, Thompson CC, Edwards RA, Brussaard CPD, et  
639 al. Marine viruses discovered via metagenomics shed light on viral strategies throughout the  
640 oceans. *Nat Commun* [Internet]. 2017 Dec 5;8(1):15955. Available from:  
641 <http://dx.doi.org/10.1038/ncomms15955>
- 642 18. Hurwitz BL, Hallam SJ, Sullivan MB. Metabolic reprogramming by viruses in the sunlit and  
643 dark ocean. *Genome Biol* [Internet]. 2013 Jan;14(11):R123. Available from:  
644 [http://www.pubmedcentral.nih.gov/articlerender.fcgi?artid=4053976&tool=pmcentrez&rende](http://www.pubmedcentral.nih.gov/articlerender.fcgi?artid=4053976&tool=pmcentrez&rendertype=abstract)  
645 [rtype=abstract](http://www.pubmedcentral.nih.gov/articlerender.fcgi?artid=4053976&tool=pmcentrez&rendertype=abstract)
- 646 19. Brum JR, Ignacio-Espinoza JC, Roux S, Doucier G, Acinas SG, Alberti A, et al. Patterns and  
647 ecological drivers of ocean viral communities. *Science* [Internet]. 2015 May 22 [cited 2015  
648 May 23];348(6237):1261498. Available from:  
649 <http://www.sciencemag.org/content/348/6237/1261498.short>
- 650 20. Ghai R, Mehrshad M, Mizuno CM, Rodriguez-Valera F. Metagenomic recovery of phage  
651 genomes of uncultured freshwater actinobacteria. *ISME J* [Internet]. 2017 Jan 9;11(1):304–8.  
652 Available from: <http://www.nature.com/articles/ismej2016110>
- 653 21. Kavagutti VS, Andrei A-Ş, Mehrshad M, Salcher MM, Ghai R. Phage-centric ecological  
654 interactions in aquatic ecosystems revealed through ultra-deep metagenomics. *Microbiome*  
655 [Internet]. 2019 Dec 20;7(1):135. Available from:  
656 <https://www.biorxiv.org/content/10.1101/670067v1>
- 657 22. Chen L-X, Zhao Y-L, McMahon KD, Mori JF, Jessen GL, Nelson TC, et al. Wide distribution  
658 of phage that infect freshwater SAR11 bacteria. *mSystems* [Internet]. 2019;4(5):e00410-19.  
659 Available from: <https://www.biorxiv.org/content/10.1101/672428v1>
- 660 23. Zaragoza-Solas A, Rodriguez-Valera F, López-Pérez M. Metagenome Mining Reveals  
661 Hidden Genomic Diversity of Pelagimyophages in Aquatic Environments. *mSystems*  
662 [Internet]. 2020;5(1):1–16. Available from:  
663 <http://msystems.asm.org/lookup/doi/10.1128/mSystems.00905-19>
- 664 24. Okazaki Y, Nishimura Y, Yoshida T, Ogata H, Nakano S. Genome-resolved viral and cellular  
665 metagenomes revealed potential key virus-host interactions in a deep freshwater lake.

- 666 Environ Microbiol [Internet]. 2019 Dec 6;21(12):4740–54. Available from:  
667 <https://onlinelibrary.wiley.com/doi/abs/10.1111/1462-2920.14816>
- 668 25. Butina TV, Bukin YS, Khanaev IV, Kravtsova LS, Maikova OO, Tupikin AE, et al.  
669 Metagenomic analysis of viral communities in diseased Baikal sponge *Lubomirskia*  
670 *baikalensis*. *Limnol Freshw Biol*. 2019;2019(1):155–62.
- 671 26. Potapov SA, Tikhonova I V, Krasnopeeov AY, Kabilov MR, Tupikin AE, Chebunina NS, et al.  
672 Metagenomic Analysis of Virioplankton from the Pelagic Zone of Lake Baikal. *Viruses*  
673 [Internet]. 2019 Oct 29;11(11):991. Available from: [https://www.mdpi.com/1999-](https://www.mdpi.com/1999-4915/11/11/991)  
674 [4915/11/11/991](https://www.mdpi.com/1999-4915/11/11/991)
- 675 27. Granin NG, Makarov MM, Kucher KM, Gnatovsky RY. Gas seeps in Lake Baikal—detection,  
676 distribution, and implications for water column mixing. *Geo-Marine Lett*. 2010;30(3–4):399–  
677 409.
- 678 28. Sunagawa S, Coelho LP, Chaffron S, Kultima JR, Labadie K, Salazar G, et al. Structure and  
679 function of the global ocean microbiome. *Science* (80- ) [Internet]. 2015 May  
680 22;348(6237):1261359–1261359. Available from:  
681 <http://www.sciencemag.org/cgi/doi/10.1126/science.1261359>
- 682 29. Roux S, Enault F, Hurwitz BL, Sullivan MB. VirSorter: mining viral signal from microbial  
683 genomic data. *PeerJ*. 2015;3:e985.
- 684 30. Ren J, Ahlgren NA, Lu YY, Fuhrman JA, Sun F. VirFinder: a novel k-mer based tool for  
685 identifying viral sequences from assembled metagenomic data. *Microbiome* [Internet].  
686 2017;5(1):69. Available from:  
687 <http://microbiomejournal.biomedcentral.com/articles/10.1186/s40168-017-0283-5>
- 688 31. Graziotin AL, Koonin E V., Kristensen DM. Prokaryotic Virus Orthologous Groups  
689 (pVOGs): a resource for comparative genomics and protein family annotation. *Nucleic Acids*  
690 *Res* [Internet]. 2017 Jan 4;45(D1):D491–8. Available from:  
691 <https://academic.oup.com/nar/article-lookup/doi/10.1093/nar/gkw975>
- 692 32. Shimaraev MN, Granin NG, Gnatovskij RJ, Blinov V V. The mechanism of oxygen aeration  
693 of bottom waters of Lake Baikal. *Dokl Earth Sci*. 2015;461(2):379–83.
- 694 33. Hurwitz BL, Brum JR, Sullivan MB. Depth-stratified functional and taxonomic niche  
695 specialization in the ‘core’ and ‘flexible’ Pacific Ocean Virome. *ISME J* [Internet].  
696 2015;9:472–84. Available from: <http://www.nature.com/doi/10.1038/ismej.2014.143>
- 697 34. Hurwitz BL, U’Ren JM. Viral metabolic reprogramming in marine ecosystems. *Curr Opin*  
698 *Microbiol* [Internet]. 2016;31:161–8. Available from:  
699 <http://www.sciencedirect.com/science/article/pii/S1369527416300376>
- 700 35. van Kessel MAHJ, Speth DR, Albertsen M, Nielsen PH, Op den Camp HJM, Kartal B, et al.  
701 Complete nitrification by a single microorganism. *Nature* [Internet]. 2015;528(7583):555–9.  
702 Available from: <http://www.nature.com/doi/10.1038/nature16459>

- 703 36. Daims H, Lebedeva EV, Pjevac P, Han P, Herbold C, Albertsen M, et al. Complete  
704 nitrification by *Nitrospira* bacteria. *Nature* [Internet]. 2015;528(7583):504–9. Available from:  
705 <http://www.nature.com/doi/10.1038/nature16461>  
706 <http://dx.doi.org/10.1038/nature16461>
- 707 37. Lückner S, Wagner M, Maixner F, Pelletier E, Koch H, Vacherie B, et al. A *Nitrospira*  
708 metagenome illuminates the physiology and evolution of globally important nitrite-oxidizing  
709 bacteria. *Proc Natl Acad Sci U S A*. 2010;107(30):13479–84.
- 710 38. Hügler M, Sievert SM. Beyond the Calvin Cycle: Autotrophic Carbon Fixation in the Ocean.  
711 *Ann Rev Mar Sci* [Internet]. 2011 Jan 15;3(1):261–89. Available from:  
712 <http://www.ncbi.nlm.nih.gov/pubmed/21329206>
- 713 39. Daims H, Lückner S, Wagner M. A New Perspective on Microbes Formerly Known as Nitrite-  
714 Oxidizing Bacteria. *Trends Microbiol* [Internet]. 2016;24(9):699–712. Available from:  
715 <http://dx.doi.org/10.1016/j.tim.2016.05.004>
- 716 40. Heaton NS, Randall G. Multifaceted roles for lipids in viral infection. *Trends Microbiol*  
717 [Internet]. 2011;19(7):368–75. Available from: <http://dx.doi.org/10.1016/j.tim.2011.03.007>
- 718 41. Lange PT, Lagunoff M, Tarakanova VL. Chewing the fat: The conserved ability of DNA  
719 viruses to hijack cellular lipid metabolism. *Viruses*. 2019;11(2):1–19.
- 720 42. Kutter E, Bryan D, Ray G, Brewster E, Blasdel B, Guttman B. From host to phage  
721 metabolism: Hot tales of phage T4’s takeover of *E. coli*. *Viruses*. 2018;10(7).
- 722 43. Yang W, Wittkopp TM, Li X, Warakanont J, Dubini A, Catalanotti C, et al. Critical role of  
723 *Chlamydomonas reinhardtii* ferredoxin-5 in maintaining membrane structure and dark  
724 metabolism. *Proc Natl Acad Sci U S A*. 2015 Dec 1;112(48):14978–83.
- 725 44. Casamayor EO, García-Cantizano J, Pedrós-Alió C. Carbon dioxide fixation in the dark by  
726 photosynthetic bacteria in sulfide-rich stratified lakes with oxic-anoxic interfaces. *Limnol*  
727 *Oceanogr* [Internet]. 2008 Jul 1 [cited 2020 Feb 11];53(4):1193–203. Available from:  
728 <http://doi.wiley.com/10.4319/lo.2008.53.4.1193>
- 729 45. Santoro AL, Bastviken D, Gudasz C, Tranvik L, Enrich-Prast A. Dark Carbon Fixation: An  
730 Important Process in Lake Sediments. *PLoS One*. 2013;8(6):1–7.
- 731 46. Chistoserdova L. Modularity of methylotrophy, revisited. *Environ Microbiol*.  
732 2011;13(10):2603–22.
- 733 47. Salcher MM, Schaeffle D, Kaspar M, Neuenschwander SM, Ghai R. Evolution in action:  
734 habitat transition from sediment to the pelagial leads to genome streamlining in  
735 *Methylophilaceae*. *ISME J* [Internet]. 2019 Nov 10;13(11):2764–77. Available from:  
736 <http://www.nature.com/articles/s41396-019-0471-3>
- 737 48. Anthony C, Williams P. The structure and mechanism of methanol dehydrogenase. *Biochim*  
738 *Biophys Acta - Proteins Proteomics*. 2003;1647(1–2):18–23.

- 739 49. Wecksler SR, Stoll S, Tran H, Magnusson OT, Wu SP, King D, et al. Pyrroloquinoline  
740 quinone biogenesis: Demonstration that PqqE from *Klebsiella pneumoniae* is a radical S-  
741 adenosyl-L-methionine enzyme. *Biochemistry*. 2009;48(42):10151–61.
- 742 50. Barr I, Latham JA, Iavarone AT, Chantarojsiri T, Hwang JD, Klinman JP. Demonstration that  
743 the radical s-adenosylmethionine (SAM) Enzyme PqqE catalyzes de novo carbon-carbon  
744 cross-linking within a peptide substrate PqqA in the presence of the peptide chaperone PqqD.  
745 *J Biol Chem*. 2016;291(17):8877–84.
- 746 51. Fontecave M, Atta M, Mulliez E. S-adenosylmethionine: Nothing goes to waste. *Trends*  
747 *Biochem Sci*. 2004;29(5):243–9.
- 748 52. Young Seo Park, Sweitzer TD, Dixon JE, Kent C. Expression, purification, and  
749 characterization of CTP:glycerol-3-phosphate cytidyltransferase from *Bacillus subtilis*. *J*  
750 *Biol Chem*. 1993;268(22):16648–54.
- 751 53. Moon K, Kang I, Kim S, Kim SJ, Cho JC. Genome characteristics and environmental  
752 distribution of the first phage that infects the LD28 clade, a freshwater methylotrophic  
753 bacterial group. *Environ Microbiol*. 2017;19(11):4714–27.
- 754 54. López-Pérez M, Haro-Moreno JM, de la Torre JR, Rodríguez-Valera F. Novel  
755 Caudovirales associated with Marine Group I Thaumarchaeota assembled from metagenomes.  
756 *Environ Microbiol* [Internet]. 2019 Jun 3;21(6):1980–8. Available from:  
757 <http://doi.wiley.com/10.1111/1462-2920.14462>
- 758 55. Cabello-Yeves PJ, Rodríguez-Valera F. Marine-freshwater prokaryotic transitions require  
759 extensive changes in the predicted proteome. *Microbiome*. 2019;7(1):1–12.
- 760 56. López-Pérez M, Haro-Moreno JM, Gonzalez-Serrano R, Parras-Moltó M, Rodríguez-Valera  
761 F. Genome diversity of marine phages recovered from Mediterranean metagenomes: Size  
762 matters. *PLoS Genet*. 2017;13(9):e1007018.
- 763 57. Votintsev KK, Meshcheryakova AI, Popovskaya GI. Cycle of organic matter in Lake Baikal.  
764 *Novosib Nauk*. 1975;
- 765 58. Khodzher T, Domysheva VM, Sorokovikova LM, Golobokova LP. Methods for monitoring  
766 the chemical composition of Lake Baikal water. In: *Novel methods for monitoring and*  
767 *managing land and water resources in Siberia*. Springer; 2016. p. 113–32.
- 768 59. Hyatt D, Chen G-L, Locascio PF, Land ML, Larimer FW, Hauser LJ. Prodigal: prokaryotic  
769 gene recognition and translation initiation site identification. *BMC Bioinformatics* [Internet].  
770 2010;11:119. Available from:  
771 [http://www.pubmedcentral.nih.gov/articlerender.fcgi?artid=2848648&tool=pmcentrez&rende](http://www.pubmedcentral.nih.gov/articlerender.fcgi?artid=2848648&tool=pmcentrez&rendertype=abstract)  
772 [rttype=abstract](http://www.pubmedcentral.nih.gov/articlerender.fcgi?artid=2848648&tool=pmcentrez&rendertype=abstract)
- 773 60. Buchfink B, Xie C, Huson DH. Fast and sensitive protein alignment using DIAMOND. *Nat*  
774 *Methods* [Internet]. 2015 Jan 17;12(1):59–60. Available from:  
775 <http://www.nature.com/articles/nmeth.3176>

- 776 61. Finn RD, Clements J, Arndt W, Miller BL, Wheeler TJ, Schreiber F, et al. HMMER web  
777 server: 2015 update. *Nucleic Acids Res.* 2015;43(W1):W30--W38.
- 778 62. Coutinho FH, Edwards RA, Rodríguez-Valera F. Charting the diversity of uncultured viruses  
779 of Archaea and Bacteria. *BMC Biol* [Internet]. 2019 Dec 29;17(1):109. Available from:  
780 <https://www.biorxiv.org/content/10.1101/480491v1.full>
- 781 63. Edwards RA, McNair K, Faust K, Raes J, Dutilh BE. Computational approaches to predict  
782 bacteriophage–host relationships. Smith M, editor. *FEMS Microbiol Rev* [Internet]. 2016  
783 Mar;40(2):258–72. Available from: [https://academic.oup.com/femsre/article-](https://academic.oup.com/femsre/article-lookup/doi/10.1093/femsre/fuv048)  
784 [lookup/doi/10.1093/femsre/fuv048](https://academic.oup.com/femsre/article-lookup/doi/10.1093/femsre/fuv048)
- 785 64. Parks DH, Chuvochina M, Waite DW, Rinke C, Skarszewski A, Chaumeil P-A, et al. A  
786 standardized bacterial taxonomy based on genome phylogeny substantially revises the tree of  
787 life. *Nat Biotechnol* [Internet]. 2018 Nov 27;36(10):996–1004. Available from:  
788 <https://www.biorxiv.org/content/early/2018/01/30/256800>
- 789 65. Chaumeil P-A, Mussig AJ, Hugenholtz P, Parks DH. GTDB-Tk: a toolkit to classify genomes  
790 with the Genome Taxonomy Database. Hancock J, editor. *Bioinformatics* [Internet]. 2019  
791 Nov 15 [cited 2020 Jan 11]; Available from:  
792 [https://academic.oup.com/bioinformatics/advance-](https://academic.oup.com/bioinformatics/advance-article/doi/10.1093/bioinformatics/btz848/5626182)  
793 [article/doi/10.1093/bioinformatics/btz848/5626182](https://academic.oup.com/bioinformatics/btz848/5626182)
- 794 66. Altschul SF, Gish W, Miller W, Myers EW, Lipman DJ. Basic local alignment search tool. *J*  
795 *Mol Biol* [Internet]. 1990;215(3):403–10. Available from:  
796 <http://www.ncbi.nlm.nih.gov/pubmed/2231712>
- 797 67. Lowe TM, Chan PP. tRNAscan-SE On-line: integrating search and context for analysis of  
798 transfer RNA genes. *Nucleic Acids Res* [Internet]. 2016 Jul 8 [cited 2020 Jan  
799 16];44(W1):W54–7. Available from: [https://academic.oup.com/nar/article-](https://academic.oup.com/nar/article-lookup/doi/10.1093/nar/gkw413)  
800 [lookup/doi/10.1093/nar/gkw413](https://academic.oup.com/nar/article-lookup/doi/10.1093/nar/gkw413)
- 801 68. Biswas A, Staals RHJ, Morales SE, Fineran PC, Brown CM. CRISPRDetect: A flexible  
802 algorithm to define CRISPR arrays. *BMC Genomics* [Internet]. 2016 Dec 17 [cited 2020 Jan  
803 16];17(1):356. Available from:  
804 <http://bmcgenomics.biomedcentral.com/articles/10.1186/s12864-016-2627-0>
- 805 69. Díez-Villaseñor C, Rodríguez-Valera F. CRISPR analysis suggests that small circular single-  
806 stranded DNA smacoviruses infect Archaea instead of humans. *Nat Commun* [Internet].  
807 2019;10(1):294. Available from: <http://www.nature.com/articles/s41467-018-08167-w>
- 808 70. Langmead B, Salzberg SL. Fast gapped-read alignment with Bowtie 2. *Nat Methods*  
809 [Internet]. 2012 Apr 4 [cited 2014 Jul 10];9(4):357–9. Available from:  
810 <http://dx.doi.org/10.1038/nmeth.1923>
- 811 71. Oksanen J. Vegan: an introduction to ordination. *Management* [Internet]. 2008;1:1–10.  
812 Available from:



813 <http://doi.acm.org/10.1145/2037556.2037605>[Cnftp://ftp3.ie.freebsd.org/pub/cran.r-](http://ftp3.ie.freebsd.org/pub/cran.r-project.org/web/packages/vegan/vignettes/intro-vegan.pdf)  
814 [project.org/web/packages/vegan/vignettes/intro-vegan.pdf](http://ftp3.ie.freebsd.org/pub/cran.r-project.org/web/packages/vegan/vignettes/intro-vegan.pdf)  
815

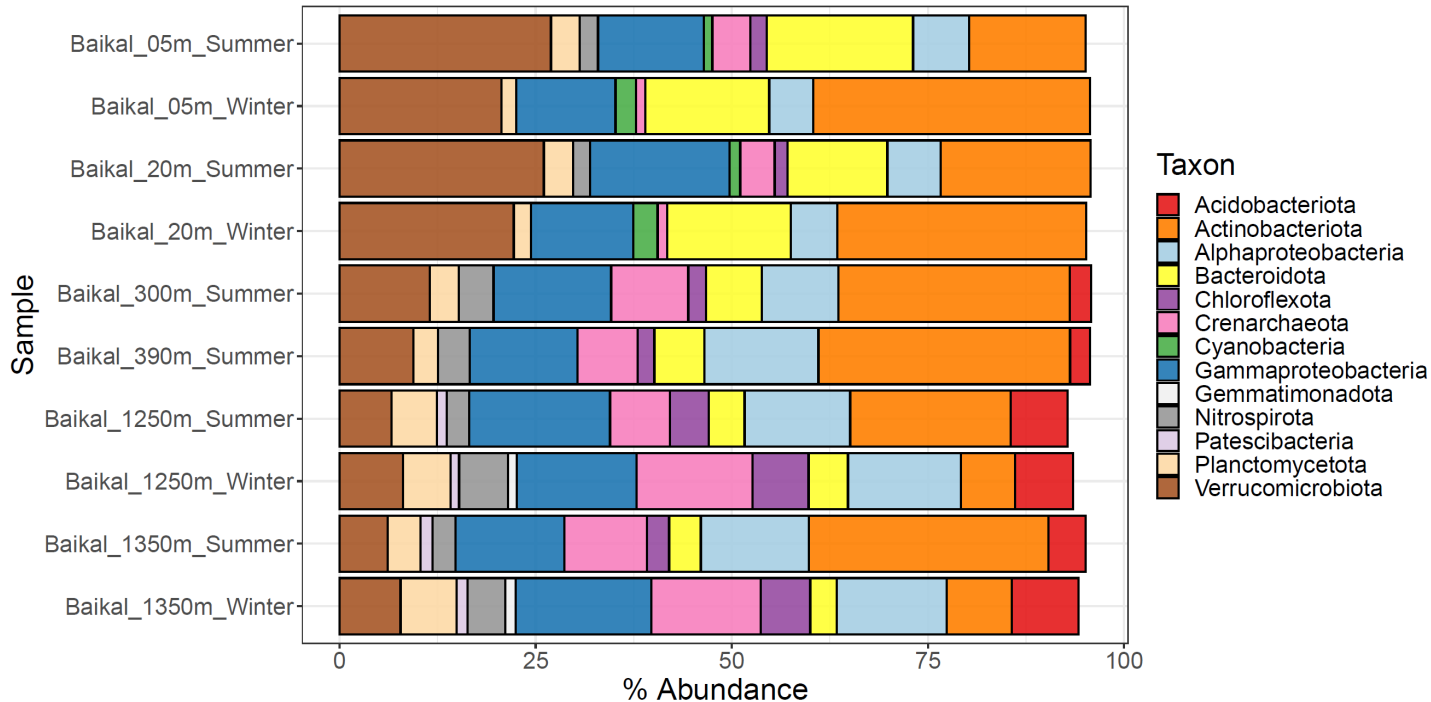

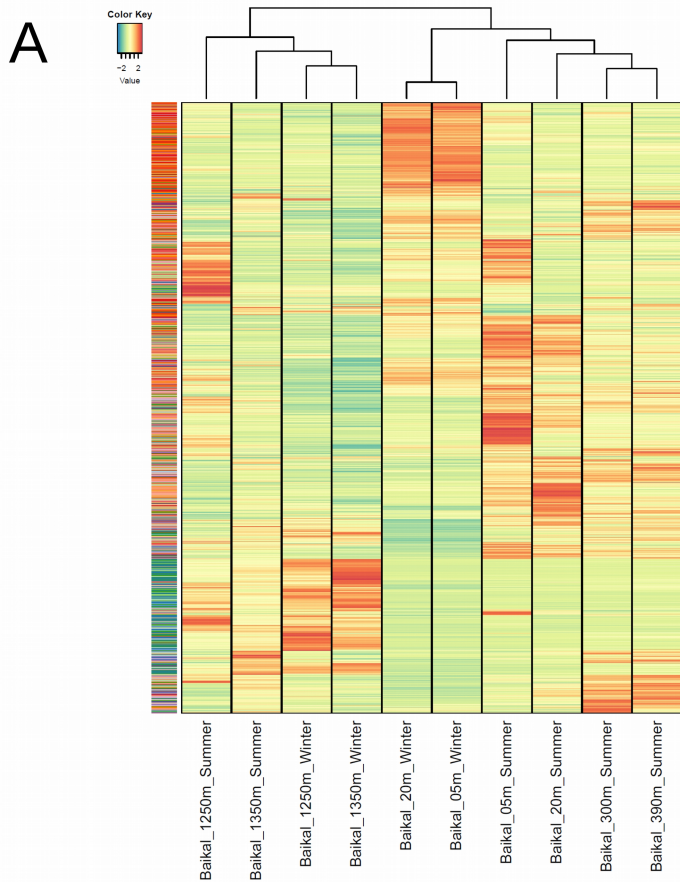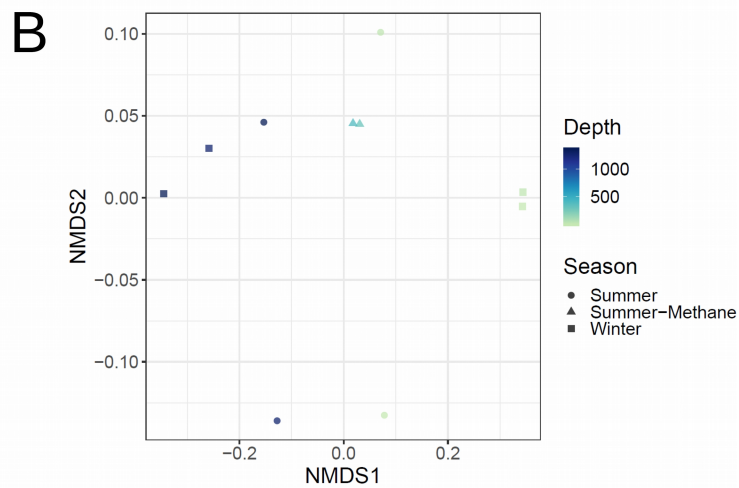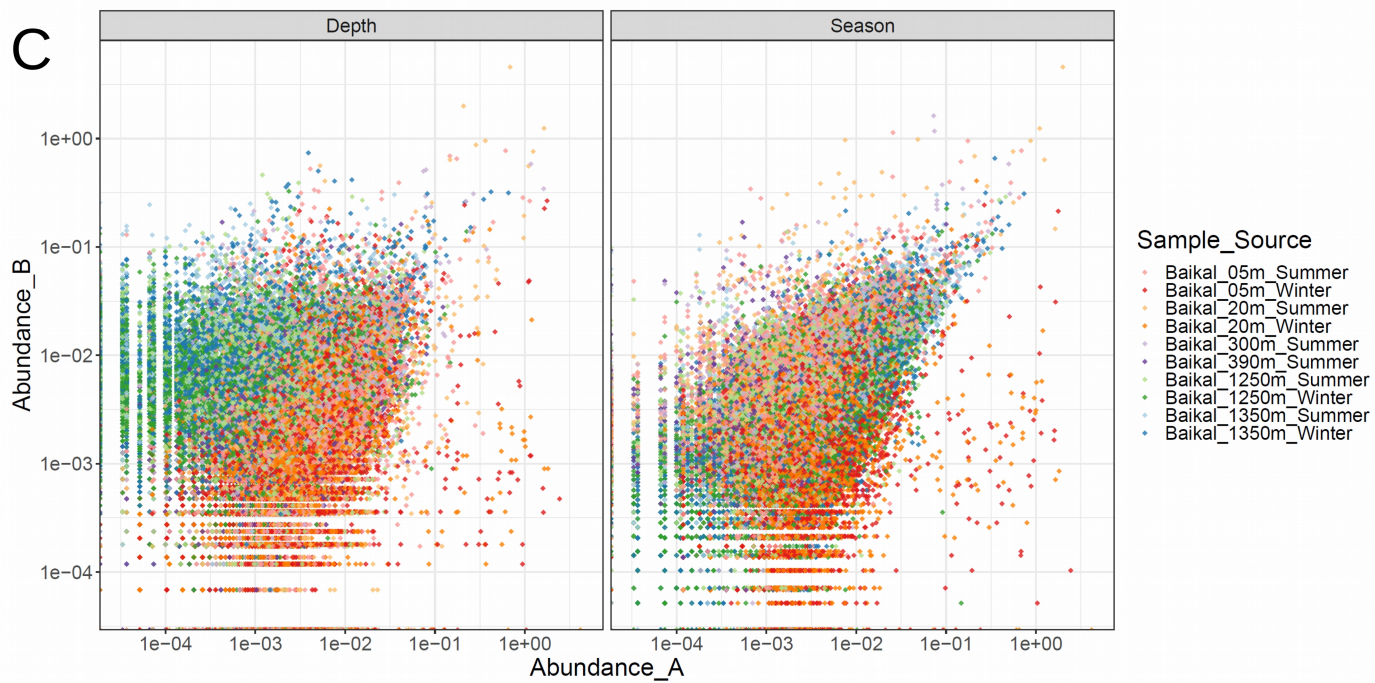

**A**

bioRxiv preprint doi: <https://doi.org/10.1101/2020.04.02.019802>; this version posted April 3, 2020. The copyright holder for this preprint (which was not certified by peer review) is the author/funder. All rights reserved. No reuse allowed without permission.

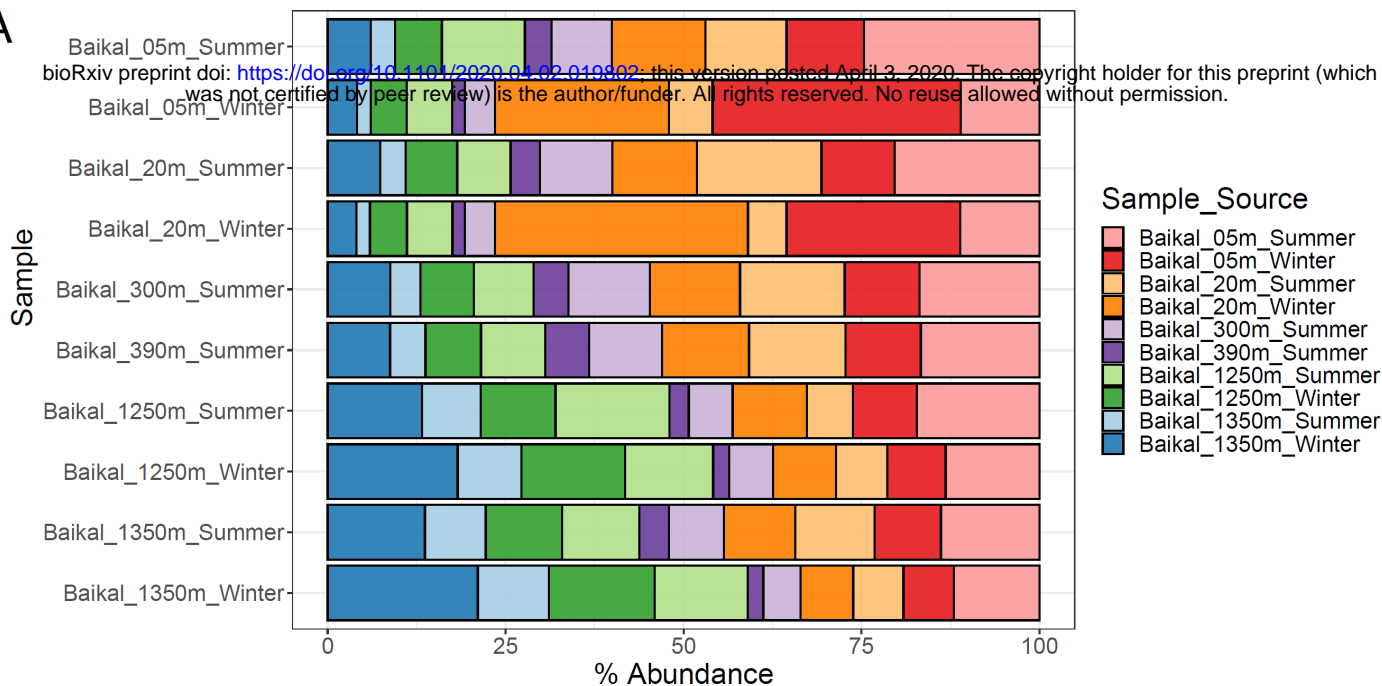

**B**

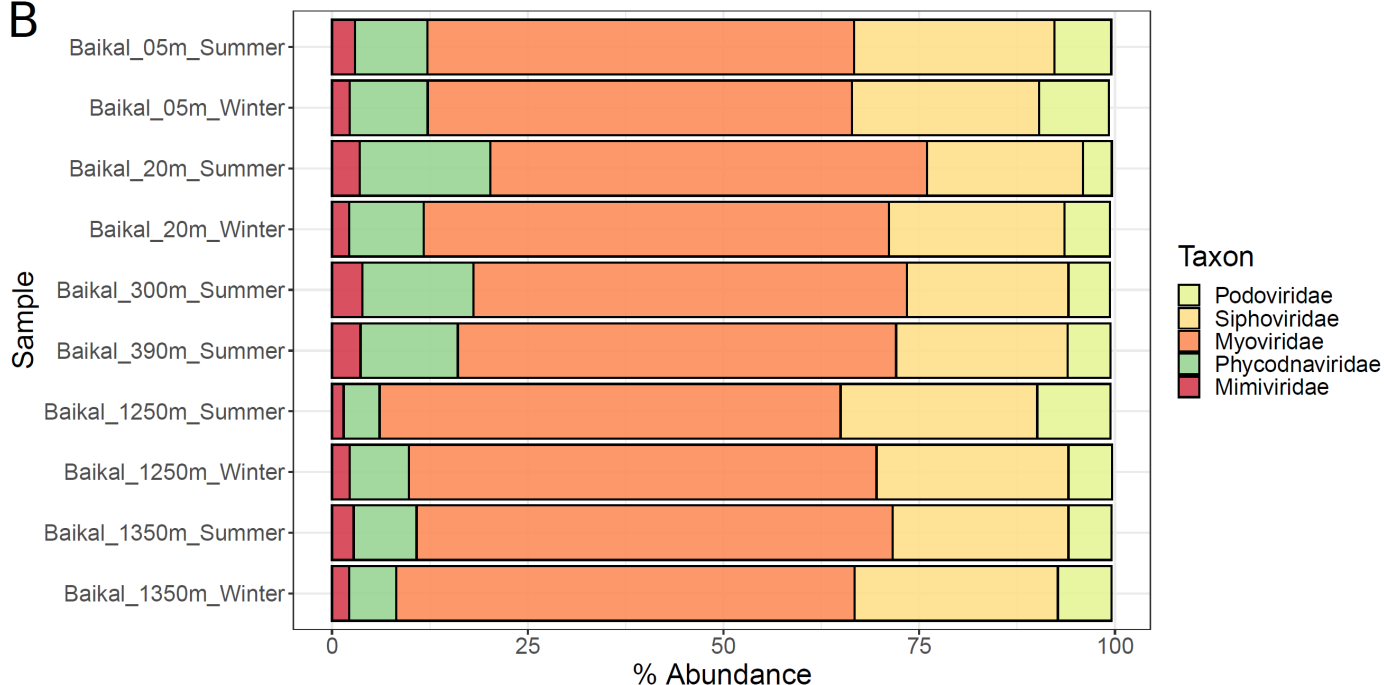

**C**

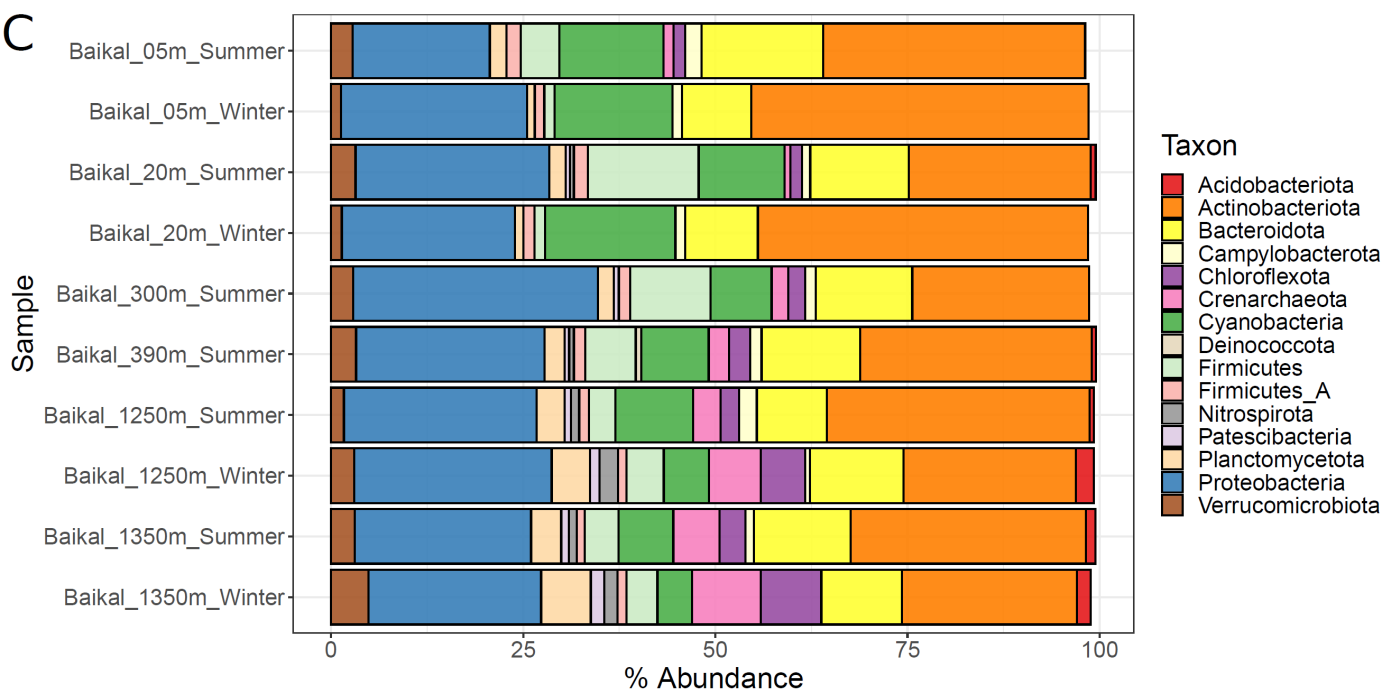

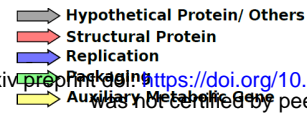

**A**

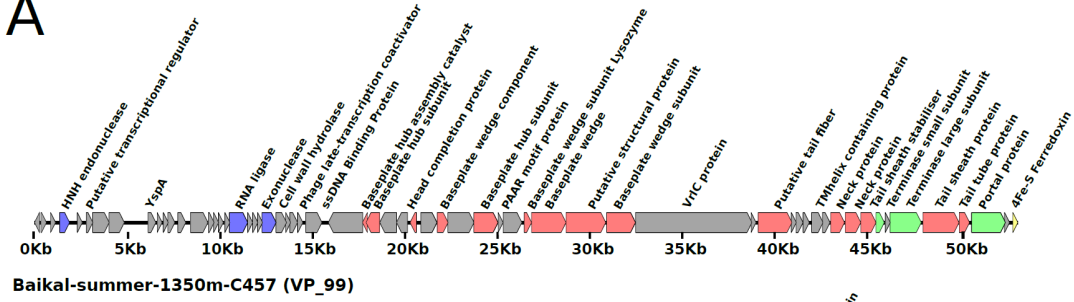

**B**

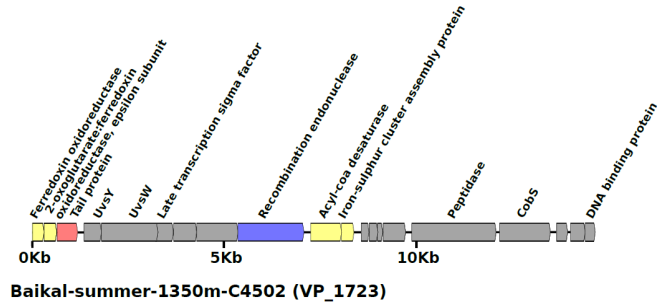

**C**

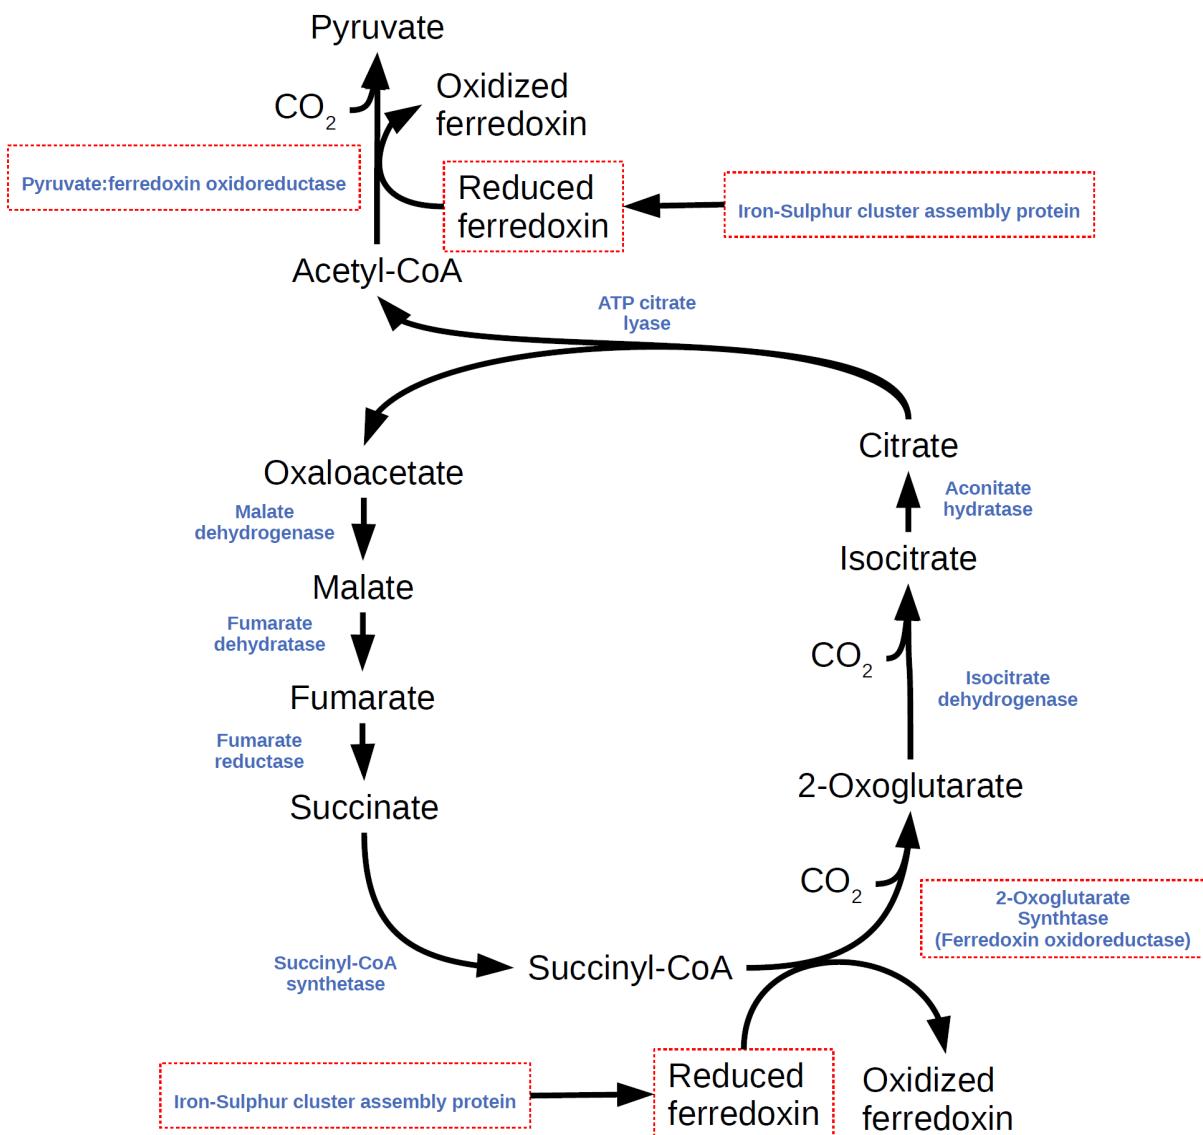



A

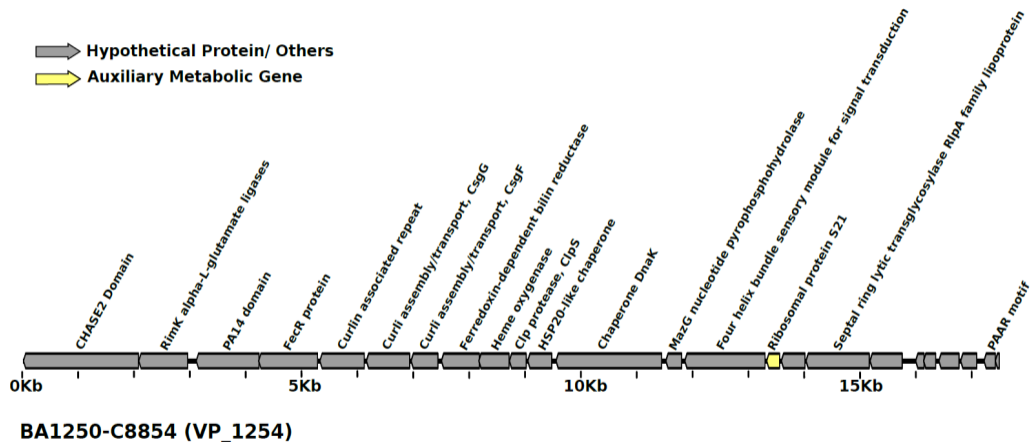

B

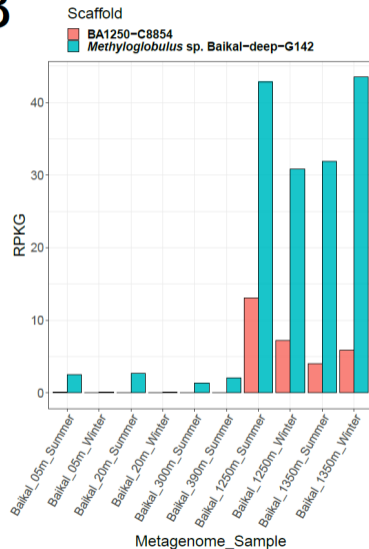

**A**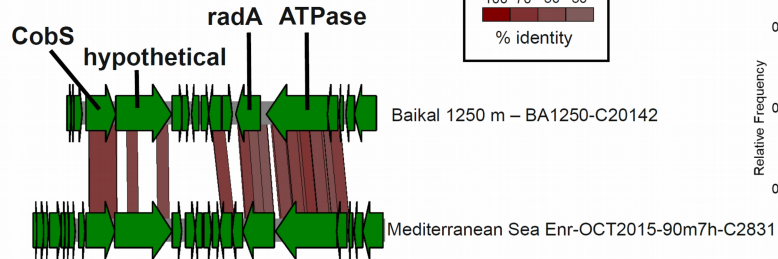**B**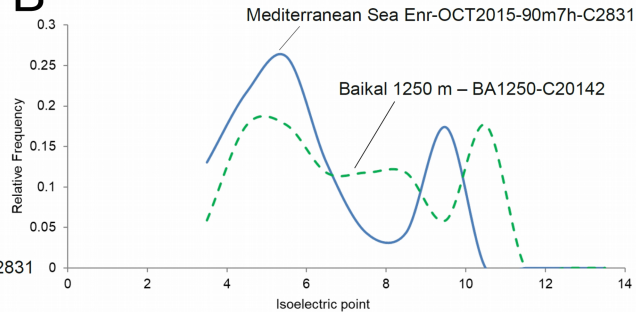

Source: https://www.biorxiv.org/content/10.1101/2020.04.02.019802v1.full.pdf
